# Supplementary material for: Characterization of the Chemical Components of the Extracted Carduus Pycnocephalus L, and Assessment of Its Potential Novel Antioxidant, Antibacterial, and Anticancer Activities
Source: Research Square preprint supplement (doi:10.21203/rs.3.rs-1019997/v1), 2021-11-05
Supplement: Supplementary file 1 [file b09ef61be993bb20434be63c.docx]

**Graphical Abstract**

**Characterization of the chemical components of the extracted *Carduus pycnocephalus* L, and assessment of its potential novel antioxidant, antibacterial, and anticancer activities**

Luay Y. El Hayyany1, El‐Sayed F. El‐Halawany1, Hoda M. Soliman1, and Yasser A. El-Amier1*

*1Botany Department, Faculty of Science, Mansoura University, Mansoura - 35516, Egypt*

** Corresponding author e-mail: yasran@mans.edu.eg; Tel. +201017229120;*

*ORCID ID:* <https://orcid.org/0000-0001-8920-8278>
